# Supplementary material for: Enhancement of NIR emission by a tight confinement of a hemicyanine dye within zeolitic MgAPO-5 nanochannels
Source: Royal Society of Chemistry journal article supplement (doi:10.1039/c8pp00029h), 2018-05-25
Supplement: c8pp00029h1.pdf [file c8pp00029h1.pdf]

## Supporting Information for:

# Enhancement of NIR emission by tight confinement of hemicyanine dye within Zeolitic MgAPO-5 Nanochannels

Ainhoa Oliden-Sánchez, Rebeca Sola-Llano, Iñigo López-Arbeloa and Virginia Martínez-Martínez\*

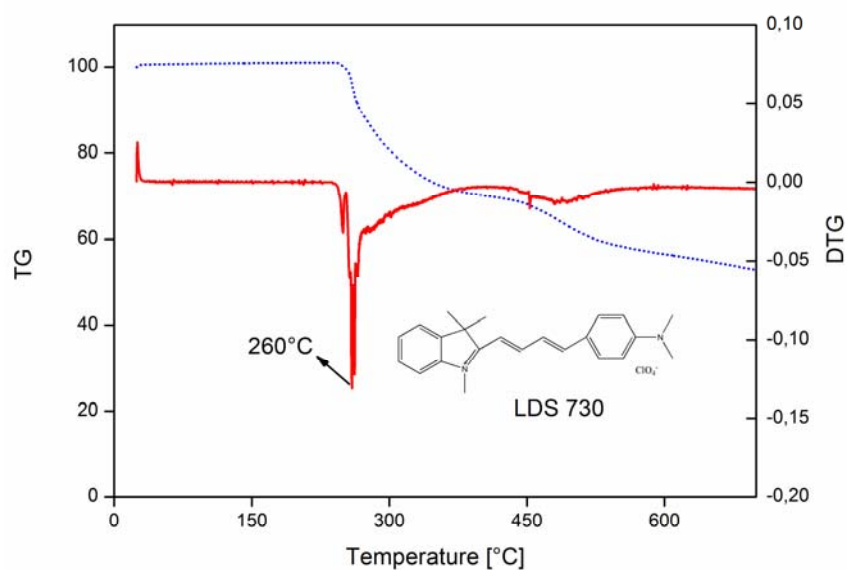

**Figure S1.** Overall thermogravimetric decomposition (TG) process of the LDS 730 dye and determination of the decomposition characteristic temperatures by the derivative thermogravimetric method (DTG).

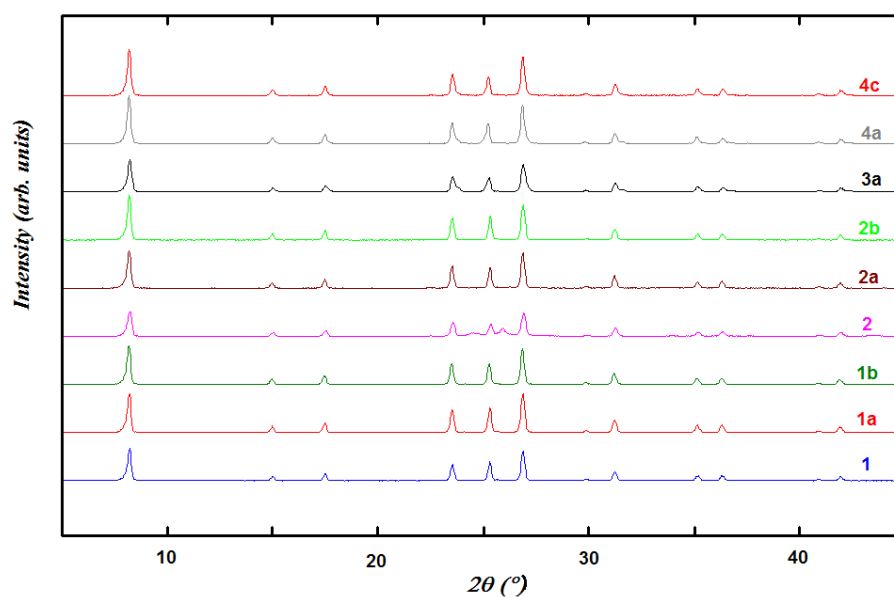

**Figure S2.** XRD patterns of all LDS 730/AFI samples synthesized at different gel molar compositions. The composition of each gel is detailed at table 1.

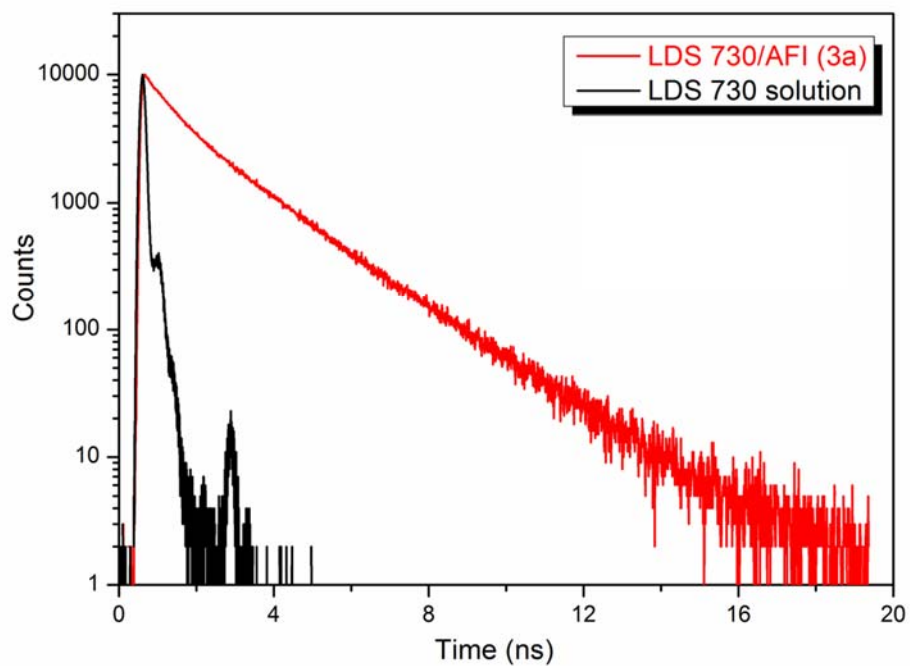

**Figure S3.** Decay fluorescence curve of a representative sample (3a) following biexponential kinetics:  $\tau_1$ : 1.97 (%49) and  $\tau_2$ : 0.43 (%51).
